# Supplementary material for: A Cotton Lignin Biosynthesis Gene, GhLAC4, Fine-Tuned by ghr-miR397 Modulates Plant Resistance Against Verticillium dahliae
Source: PubMed Central journal article supplement (PMC8636836; doi:10.3389/fpls.2021.743795), 2021-11-18
Supplement: Data_Sheet_1.pdf [file Data_Sheet_1.pdf]

## Supplementary Figures and Table

### **A cotton lignin biosynthesis gene, *GhLAC4*, fine-tuned by ghr-miR397 modulates plant resistance against *Verticillium dahliae***

Taiping Wei<sup>1,2</sup>, Ye Tang<sup>2</sup>, Pei Jia<sup>2</sup>, Yanming Zeng<sup>2</sup>, BingTing Wang<sup>2</sup>, Pan Wu<sup>2</sup>, Yonggang Quan<sup>3</sup>, Aimin Chen<sup>3</sup>, Yucheng Li<sup>1\*</sup>, Jiahe Wu<sup>1,2\*</sup>

<sup>1</sup>School of Resources and Environmental Engineering, Anhui University, Anhui province, Hefei, 230601, China

<sup>2</sup>State Key Laboratory of Plant Genomic, Institute of Microbiology, Chinese Academy of Sciences, Beijing, 100101, China

<sup>3</sup>The Key Laboratory for the Creation of Cotton Varieties in the Northwest, Ministry of Agriculture, Join Hope Seeds CO. Ltd, Changji, Xinjiang, 831100, China

#### **\* Corresponding Authors:**

Wu, Jiahe, wujiahe@im.ac.cn; Li, Yucheng, li-yucheng@163.com

**Running title:** *GhLAC4* biosynthesis lignin increasing defense

## Supplementary Figure S1

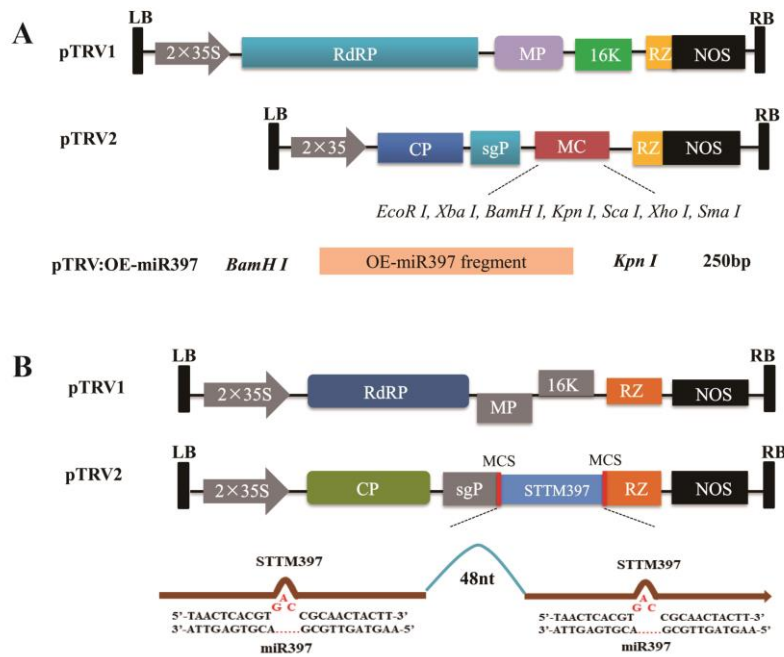

### Supplementary Figure S1. Schematic diagram of ghr-miR397 overexpression and silencing vectors.

(A) Schematic diagram of ghr-miR397 overexpression vector. (B) Schematic diagram of ghr-miR397 silencing vector.

**Supplementary Figure S2**

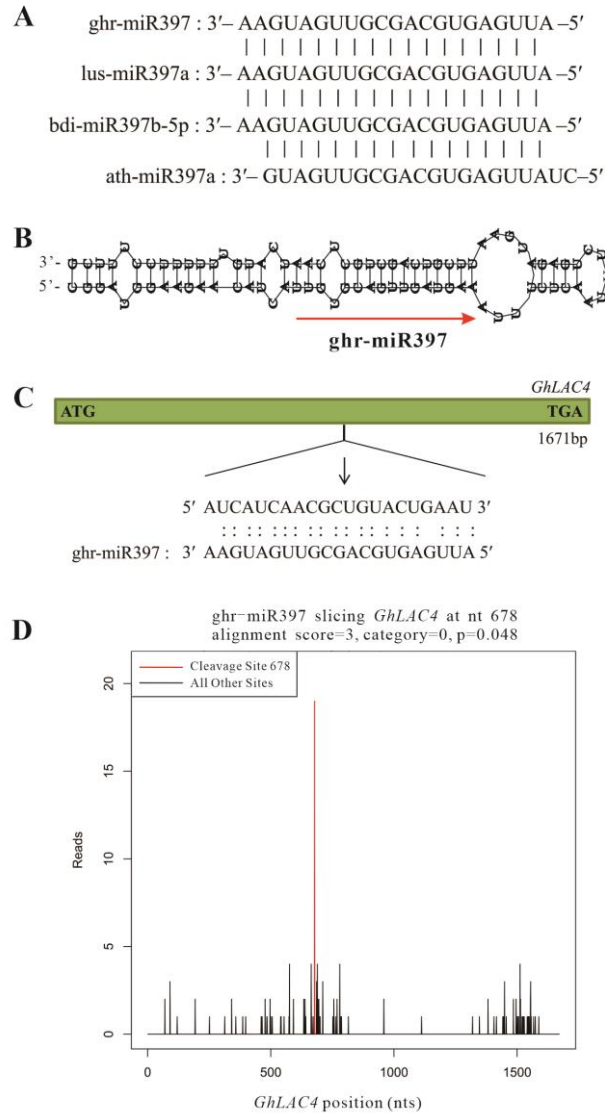

**Supplementary Figure S2. Ghr-miR397 nucleotides and base complementary with *GhLAC4* and degradome analysis.**

(A) The alignment of ghr-miR397 nucleotides with miR397 from *Linum usitatissimum*, *Brachypodium distachyon* and *Arabidopsis thaliana*. (B) Stem-loop structure of the ghr-miR397 precursor. The red arrow underlined indicated the mature sequence of miR397. (C) *GhLAC4* mRNA is complementary to ghr-miR397, and the black arrow indicates the cleavage site of the target gene. (D) T-shaped plots of ghr-miR397 and *GhLAC4* were verified by degradome sequencing. The T-plot shows the position of degradome markers in the full length of the target mRNA sequence.

### Supplementary Figure S3

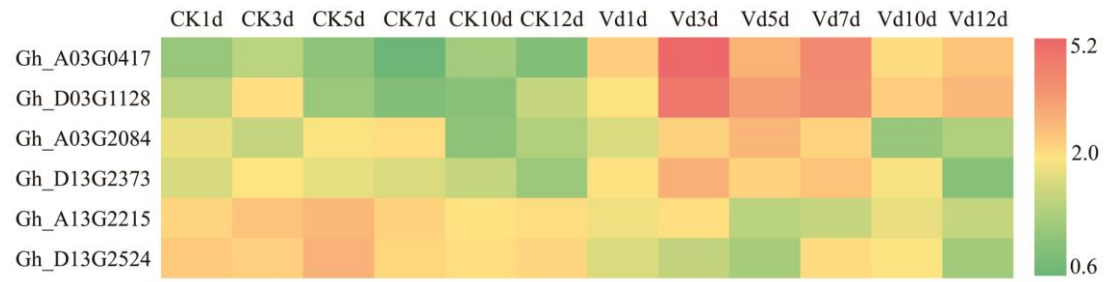

**Supplementary Figure S3. The expression analysis of six targeted LAC genes under *V. dahliae* infection.**

Heatmaps of differently expressed target genes in the 1, 3, 5, 7, 10 and 12 days postinoculation samples compared with the control. The color bar represents the relative signal intensity values from red (upregulated) to green (downregulated), indicating a range of 0.6 to 5.2.

### Supplementary Figure S4

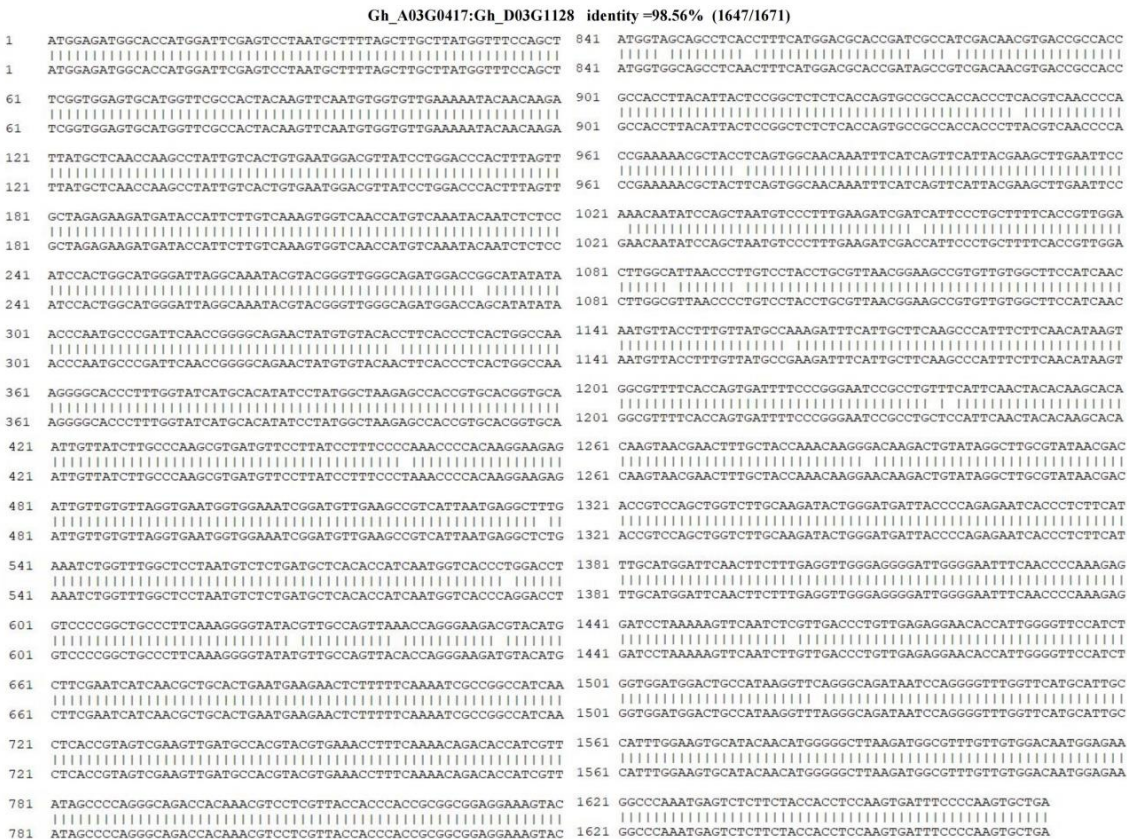

**Supplementary Figure S4. Alignment of Gh\_A03G0417 and Gh\_D03G1128 nucleotide sequences.**

**Supplementary Figure S5**

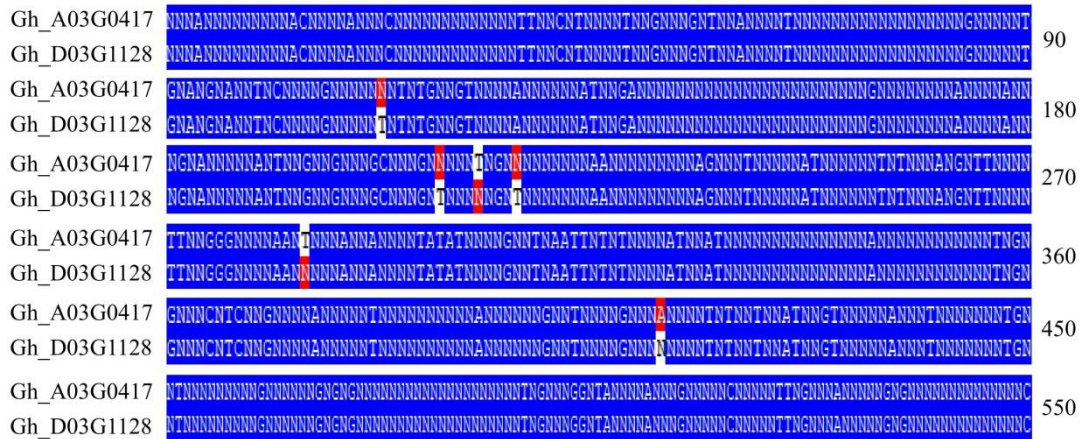

**Supplementary Figure S5. Alignment of Gh\_A03G0417 with Gh\_D03G1128 amino acid sequence.**

Supplementary Figure S6

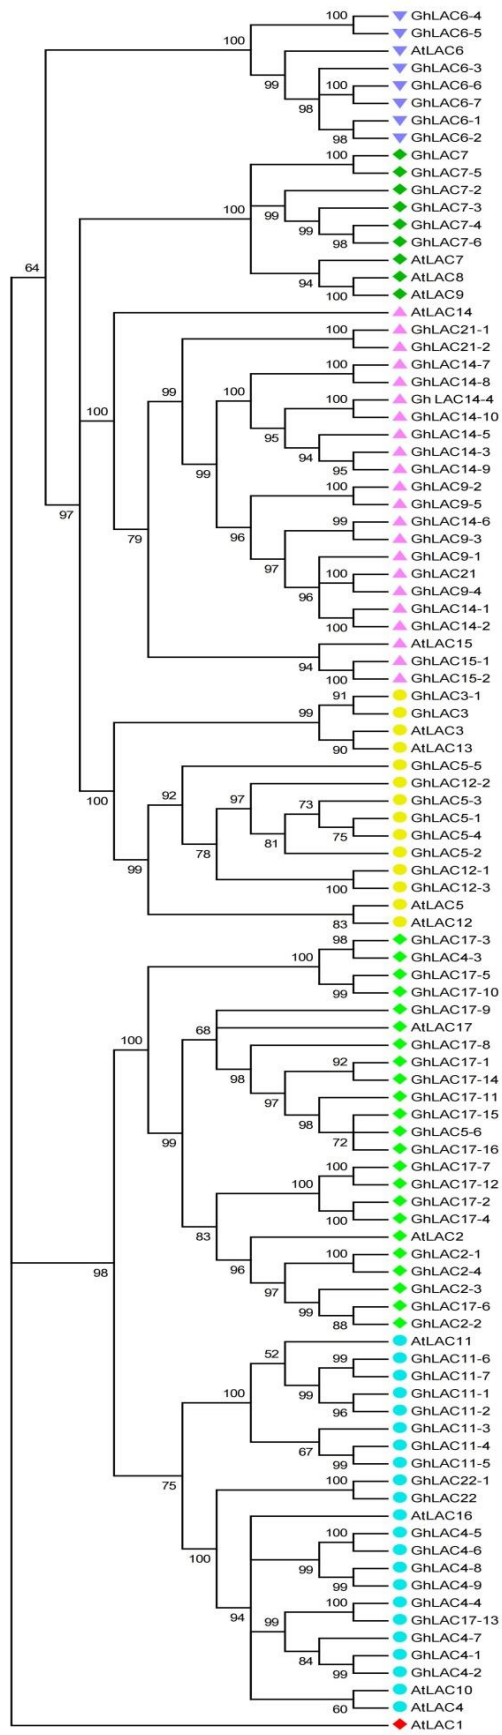



**Supplementary Figure S6. Phylogenetic tree analysis of LACs gene family in *G. hirsutum* and *A. thaliana*.**

It was performed using MEGA(Version7.1) software. According to different colors, they were divided into 6 groups, including fluorescent green group 1, sky blue group 2, yellow group 3, pink group 4, dark green group 5 and blue purple group 6, GhLAC4-9 and GhLAC4-8 are indicated in red box.

**Supplementary Figure S7**

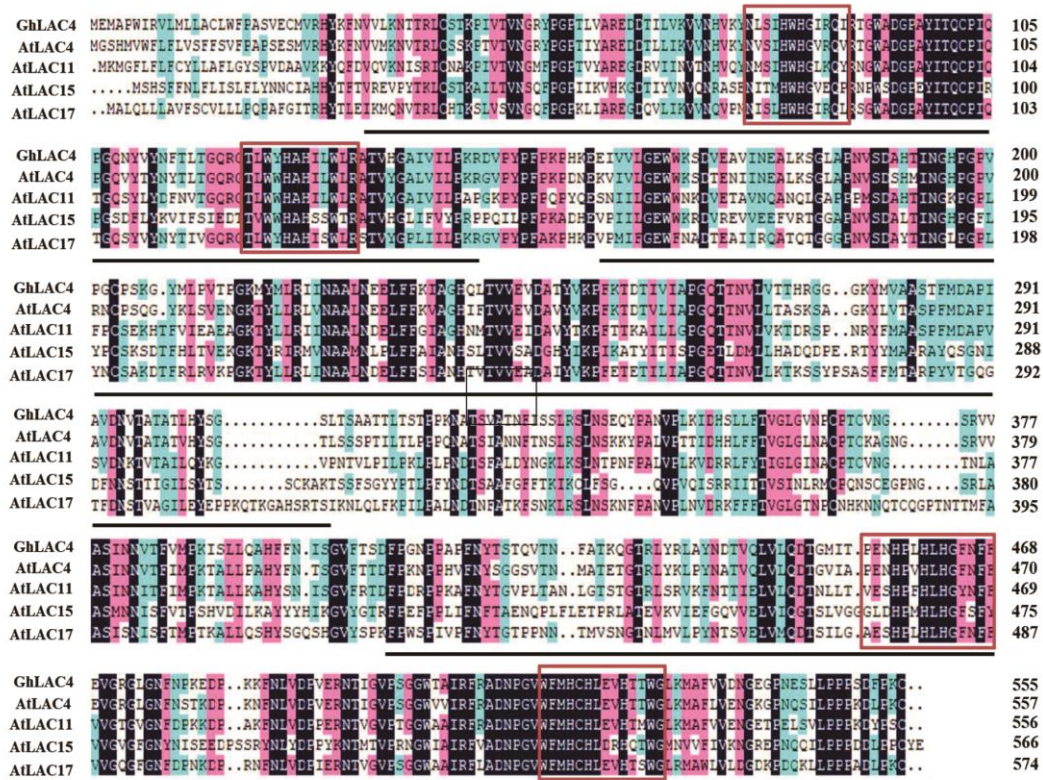

**Supplementary Figure S7. Amino acid sequence alignment between GhLAC4 and four Arabidopsis laccases acting in lignin biosynthesis.**

The black lines represent the oxidase domains and the red boxes represent the copper ion binding domains of laccases.

### Supplementary Figure S8

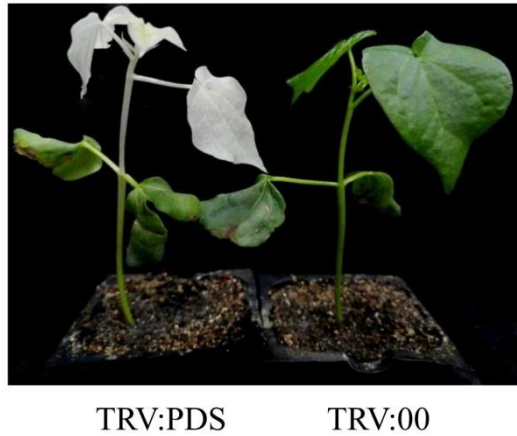

Supplementary Figure S8. Photo-bleaching leaves of *GhPDS*-silenced plants.

### Supplementary Figure S9

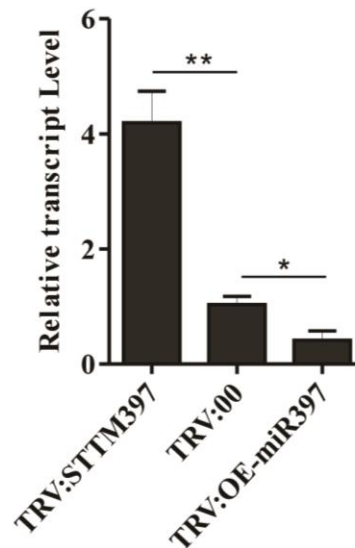

Supplementary Figure S9. Relative expression levels of *GhLAC4* in TRV:STTM397, TRV:OE-miR397 and TRV:00 plants. Mean with SD comes from triple repeats experiments. Significant differences were determined using Student's *t*-test (\* $P < 0.05$ , \*\* $P < 0.01$ ).





Supplementary Table S1. Primers used in the present research

|    | A            | B                                                                 | C                        |
|----|--------------|-------------------------------------------------------------------|--------------------------|
| 1  | Primer name  | Sequence(5'-3')                                                   | destination              |
| 2  | LAC4-F       | AGAAGGCCTCCATGGGGATCCTTGAATGGAGCAGGC<br>GGA                       | VIGS                     |
| 3  | LAC4-R       | GAGACGCGTGAGCTCGGTACCCGTCAACCCACCGA<br>AAAA                       | VIGS                     |
| 4  | OE-miR397-F  | AGAAGGCCTCCATGGGGATCCATCCCCGGATGGAAG<br>AAACA                     | overexpression           |
| 5  | OE-miR397-R  | GAGACGCGTGAGCTCGGTACCAATTTACTTTTCAATT<br>GTTCCAAAGG               | overexpression           |
| 6  | STTM397-F    | AACGAGTCTAGAGGATCCTAACTCACGTGACCGCAA<br>CTACTTGTGTGTTGTTGTTATGGTC | STTM                     |
| 7  | STTM397-R    | CGGGCCTCGAGGGTACCAAGTAGTTGCGGTCACGTG<br>AGTTAATTCTTCTTCTTTAGACCA  | STTM                     |
| 8  | V-PDS-F      | GAAGGAGCTGAATATCACTCCC                                            | VIGS                     |
| 9  | V-PDS-R      | ATTAACACCGTTGCGGCTAAGC                                            | VIGS                     |
| 10 | qLAC4-F      | GACCATTCCCTGCTTTTCACC                                             | qRT-PCR                  |
| 11 | qLAC4-R      | TGCTTGTGTAGTTGAATGGAGC                                            | qRT-PCR                  |
| 12 | qmiR397-F    | CGCGATTGAGTGCAGCGTT                                               | qRT-PCR                  |
| 13 | qmiR397-R    | AGTGCAGGGTCCGAGGTATT                                              | qRT-PCR                  |
| 14 | qLAC22-F     | GAGACGCGTGAGCTCGGTACCAAGGCATCAAAGGTT<br>TTCCAGG                   | qRT-PCR                  |
| 15 | qLAC22-R     | AGAAGGCCTCCATGGGGATCCGCCGAATCTCTTCGA<br>AGCCT                     | qRT-PCR                  |
| 16 | qLAC11-F     | GAGACGCGTGAGCTCGGTACCTACCAAGATTGTCAG<br>TCAATGGTG                 | qRT-PCR                  |
| 17 | qLAC11-R     | AGAAGGCCTCCATGGGGATCCGCAAATGTGCCTCTT<br>AAAGTTGAC                 | qRT-PCR                  |
| 18 | qU6-F        | CGGGGACATCCGATAAAATTGGAAC                                         | qRT-PCR                  |
| 19 | qU6-R        | GGACCATTCTCGATTGTGCGTG                                            | qRT-PCR                  |
| 20 | V.dtubulin-F | AACAACAGTCCGATGGATAATTC                                           | qRT-PCR                  |
| 21 | V.dtubulin-R | GTACCGGGCTCGAGATCG                                                | qRT-PCR                  |
| 22 | qUB7-F       | GAAGGCATTCCACCTGACCAAC                                            | qRT-PCR                  |
| 23 | qUB7-R       | CTTGACCTTCTTCTTGTGCTTG                                            | qRT-PCR                  |
| 24 | RemiR397     | GTCGTATCCAGTGCAGGGTCCGAGGTATTTCGCACTG<br>GATACGACTTCATC           | Reverse<br>transcription |
| 25 | qPR1-F       | AAGGCCGACTACGATTACAGC                                             | qRT-PCR                  |
| 26 | qPR1-R       | CGCCATTGTTGCACTTCACC                                              | qRT-PCR                  |
| 27 | qPR3-F       | GATGACTCCACAATCACCGAAGC                                           | qRT-PCR                  |
| 28 | qPR3-R       | GCGGTCTTCTACCTGGGCATT                                             | qRT-PCR                  |
| 29 | qPR5-F       | TGGTCCGACCCGTTATTCAA                                              | qRT-PCR                  |
| 30 | qPR5-R       | CCCGAGGCTCACCTCAT                                                 | qRT-PCR                  |

|    |              |                                                     |                         |
|----|--------------|-----------------------------------------------------|-------------------------|
| 31 | qPDF1.2-F    | CTGTCCTAGCGGATGGTGATAAG                             | qRT-PCR                 |
| 32 | qPDF1.2-R    | GTGCAGACGCATTTGCGAAGGAA                             | qRT-PCR                 |
| 33 | q4CL-F       | AAGTGACGATTGCTCCGATTGT                              | qRT-PCR                 |
| 34 | q4CL-R       | ACTGGTCCTGCCTCGGTCATAC                              | qRT-PCR                 |
| 35 | qCCoAOMT-F   | TGGTGAAGGTTGGTGGTTTGAT                              | qRT-PCR                 |
| 36 | qCCoAOMT-R   | CATGCAAATCTCAATCCTGGGG                              | qRT-PCR                 |
| 37 | qCOMT-F      | ACGATTGGAGCGATGAGCACTG                              | qRT-PCR                 |
| 38 | qCOMT-R      | AACCTTGAAACCCAGCACTCCT                              | qRT-PCR                 |
| 39 | qF5H-F       | TGGATGTGATGTTTCGGTGGGAC                             | qRT-PCR                 |
| 40 | qF5H-R       | GATACCCCGCCACTATTGCCTC                              | qRT-PCR                 |
| 41 | qCAD-F       | ACCCCTCTTCAGTTTGTTCCTC                              | qRT-PCR                 |
| 42 | qCAD-R       | CATCGTTCTTCTCCAGCCTCTC                              | qRT-PCR                 |
| 43 | qC4H-F       | AGAGGAAGAAGCTTGCAGCAC                               | qRT-PCR                 |
| 44 | qC4H-R       | GTTCAAGCTCAGCAATGCC                                 | qRT-PCR                 |
| 45 | qHCT-F       | CTGAAAGCACAGCAATCTCCAT                              | qRT-PCR                 |
| 46 | qHCT-R       | CCAAAGTAACCAGGTGGGAGTG                              | qRT-PCR                 |
| 47 | qC3H-F       | AAACGTGTGGCCGCGATATTA                               | qRT-PCR                 |
| 48 | qC3H-R       | ATCACTTGCTTATCGCGCCCTT                              | qRT-PCR                 |
| 49 | qC4H-F       | AGAGGAAGAAGCTTGCAGCAC                               | qRT-PCR                 |
| 51 | qC4H-R       | GTTCAAGCTCAGCAATGCC                                 | qRT-PCR                 |
| 52 | qCCR-R       | AGGTGGAAAAAGTGGCCAAAGC                              | qRT-PCR                 |
| 53 | qCCR-R       | GCCTCTTGTGTCTTCGCACTA                               | qRT-PCR                 |
| 54 | LAC4-GUS-F   | GAGAACACGGGGACTCTAGAATGGAGATGGCACCA<br>TGGATTC      | transient<br>expression |
| 55 | LAC4-GUS-R   | ATAAGGGACTGACCACCCGGGATCCGCACTTGGGG<br>AAATCACTTGG  | transient<br>expression |
| 56 | Pre-miR397-F | CCTGTGACGGATCCTCTAGAATCCCCGGATGGAAG<br>AAACA        | transient<br>expression |
| 57 | Pre-miR397-R | GGATACATGTACGTAACGCGTAATTTACTTTTCAATTG<br>TTCCAAAGG | transient<br>expression |
| 58 | mLAC4-GUS-F  | TGCTTCGAATCATCAATGCAGCTTTGAATGAAGAACT<br>CTT        | transient<br>expression |
| 59 | mLAC4-GUS-R  | GTTCTTCATTCAAAGCTGCATTGATGATTCGAAGCAT<br>GTAC       | transient<br>expression |
| 60 | LAC4F1       | TGCCAGTTACACCAGGGAAG                                | transient<br>expression |
| 61 | LAC4R1       | ACGAGGACGTTTGTGGTCTG                                | transient<br>expression |
| 62 | LAC4F2       | GAAGAACTCTTTTCAAATCGCCG                             | transient<br>expression |
